# Supplementary material for: From Perception to Metacognition: Auditory and Olfactory Functions in Early Blind, Late Blind, and Sighted Individuals
Source: PubMed Central journal article supplement (PMC5037222; doi:10.3389/fpsyg.2016.01450), 2016-09-27
Supplement: Table1.pdf [file Table1.pdf]

## *Supplementary Material*

### **From perception to metacognition: Auditory and olfactory functions in early blind, late blind, and sighted individuals**

**Stina Cornell Kärnekull<sup>1†</sup>, Artin Arshamian<sup>1,2,3†\*</sup> Mats E Nilsson<sup>1</sup>, Maria Larsson<sup>1</sup>**

**\* Correspondence:** Dr. Artin Arshamian: artin.arshamian@ki.se

**Table S1.** Results from separate univariate analyses of variance (ANOVAs) on hit rate, false alarm rate, sensitivity ( $d'$ ), and response bias ( $c$ ) with familiarity (high, low) and group (early blind, late blind, sighted) as independent variables are presented for odors and sounds, respectively. In addition, the results from an ANOVA on sound identification with familiarity (high, low) and group (early blind, late blind, sighted) as independent variables are presented.

| Modality | Dependent variable    | Independent variable | $F$                   | df   |
|----------|-----------------------|----------------------|-----------------------|------|
| Odor     | Hit rate              | Group                | 0.54                  | 2,57 |
|          |                       | Familiarity          | 22.28 <sup>***</sup>  | 1,57 |
|          |                       | Group * Familiarity  | 1.56                  | 2,57 |
|          | False alarm rate      | Group                | 1.00                  | 2,57 |
|          |                       | Familiarity          | 3.13                  | 1,57 |
|          |                       | Group * Familiarity  | 0.69                  | 2,57 |
|          | Sensitivity ( $d'$ )  | Group                | 0.64                  | 2,57 |
|          |                       | Familiarity          | 18.69 <sup>***</sup>  | 1,57 |
|          |                       | Group * Familiarity  | 1.78                  | 2,57 |
|          | Response bias ( $c$ ) | Group                | 0.89                  | 2,57 |
|          |                       | Familiarity          | 3.65                  | 1,57 |
|          |                       | Group * Familiarity  | 0.30                  | 2,57 |
| Sound    | Hit rate              | Group                | 1.12                  | 2,57 |
|          |                       | Familiarity          | 37.79 <sup>***</sup>  | 1,57 |
|          |                       | Group * Familiarity  | 0.54                  | 2,57 |
|          | False alarm rate      | Group                | 2.84                  | 2,57 |
|          |                       | Familiarity          | 0.26                  | 1,57 |
|          |                       | Group * Familiarity  | 1.52                  | 2,57 |
|          | Identification        | Group                | 1.13                  | 2,57 |
|          |                       | Familiarity          | 796.14 <sup>***</sup> | 1,57 |
|          |                       | Group * Familiarity  | 0.12                  | 2,57 |
|          | Sensitivity ( $d'$ )  | Group                | 6.11 <sup>**</sup>    | 2,57 |
|          |                       | Familiarity          | 13.35 <sup>**</sup>   | 1,57 |
|          |                       | Group * Familiarity  | 0.55                  | 2,57 |
|          | Response bias ( $c$ ) | Group                | 0.35                  | 2,57 |
|          |                       | Familiarity          | 24.64 <sup>***</sup>  | 1,57 |
|          |                       | Group * Familiarity  | 1.57                  | 2,57 |

Note. <sup>\*\*</sup>  $p < 0.01$ , <sup>\*\*\*</sup>  $p < 0.001$
